# Supplementary material for: Neutrophil-to-Lymphocyte Ratio, Monocyte-to-Lymphocyte Ratio, Platelet-to-Lymphocyte Ratio, and Mean Platelet Volume-to-Platelet Count Ratio as Biomarkers in Critically Ill and Injured Patients: Which Ratio to Choose to Predict Outcome and Nature of Bacteremia?
Source: Hindawi journal article supplement (doi:10.1155/2018/3758068), 2018-07-15
Supplement: f1 [file 3758068.f1.pdf]

Table 1. Baseline and laboratory characteristics of the peritonitis subgroup according to outcome

| Characteristics                                      | All patients              | Survivors                 | Nonsurvivors              | <i>p</i> value     |
|------------------------------------------------------|---------------------------|---------------------------|---------------------------|--------------------|
| Number of patients (%)                               | 196 (100 %)               | 93 (47.4 %)               | 103 (52.6 %)              | -                  |
| Males, number (%)                                    | 79 (40.3%)                | 49 (52.7)                 | 30 (29.1)                 | <i>p</i> = 0.001** |
| Age (years)                                          | 59.58 ± 17.78             | 50.44 ± 18.75             | 67.83 ± 11.92             | <i>p</i> ≤ 0.001** |
| Gram-positive blood cultures, number (%)             | 43 (21.9 %)               | 31 (33.3)                 | 12 (11.7)                 | <i>p</i> ≤ 0.001** |
| Gram-negative blood cultures, number (%)             | 15 (7.7 %)                | 11 (11.8)                 | 4 (3.9)                   | <i>p</i> = 0.045*  |
| Polymicrobial blood cultures, number (%)             | 91 (46.4 %)               | 18 (19.4)                 | 73 (70.9)                 | <i>p</i> ≤ 0.001** |
| Negative blood culture number (%)                    | 47 (24.0 %)               | 33 (35.5)                 | 14 (13.6)                 | <i>p</i> = 0.001** |
| WBC count (10 <sup>9</sup> /L)                       | 12.83 ± 5.74              | 13.24 ± 4.39              | 12.45 ± 6.73              | <i>p</i> = 0.324   |
| Neutrophil (10 <sup>9</sup> /L)                      | 10.55 (8.08–13.72)        | 11.05 (8.98–13.77)        | 10.08 (6.72–13.42)        | <i>p</i> = 0.136   |
| Lymphocyte (10 <sup>9</sup> /L)                      | 0.95 (0.58–1.29)          | 1.04 (0.79–1.41)          | 0.76 (0.45–1.21)          | <i>p</i> = 0.001** |
| Monocyte (10 <sup>9</sup> /L)                        | 0.54 (0.27–0.85)          | 0.59 (0.36–0.98)          | 0.48 (0.20–0.79)          | <i>p</i> = 0.008** |
| Platelet (10 <sup>9</sup> /L)                        | 228.56 ± 136.88           | 271.78 ± 134.98           | 189.54 ± 127.06           | <i>p</i> ≤ 0.001** |
| MPV (fL)                                             | 9.15 ± 1.68               | 8.75 ± 1.47               | 9.55 ± 1.79               | <i>p</i> = 0.001** |
| MPV/PC ratio (fL 10 <sup>-5</sup> μL <sup>-1</sup> ) | 3.6 (2.7–6.2)             | 3.4 (2.3–4.8)             | 4.5 (3.2–8.5)             | <i>p</i> ≤ 0.001** |
| NLR                                                  | 11.20 (7.87–17.25)        | 10.31 (7.97–13.58)        | 12.80 (7.75–20.01)        | <i>p</i> = 0.027*  |
| MLR                                                  | 0.51 (0.34–0.94)          | 0.51 (0.35–0.97)          | 0.51 (0.32–0.94)          | <i>p</i> = 0.398   |
| PLR                                                  | 227.90<br>(167.65–362.89) | 229.66<br>(170.27–331.68) | 226.51<br>(166.61–416.67) | <i>p</i> = 0.289   |

Data are shown as number (%), mean (standard deviation, SD), or median (interquartile range, IQR) as appropriate.

Significant differences are marked by \* (*p* < 0.05) or \*\* (*p* < 0.01).

Table 2. Clinical accuracy of baseline biomarkers in predicting lethal outcome in peritonitis subgroup

| Biomarker  | AUC<br>ROC | <i>p</i> value | 95% Confidence Interval |             | Cut-off<br>value | Sensitivity<br>(%) | Specificity<br>(%) | Youden<br>index |
|------------|------------|----------------|-------------------------|-------------|------------------|--------------------|--------------------|-----------------|
|            |            |                | Lower Bound             | Upper Bound |                  |                    |                    |                 |
| Lymphocyte | 0.639      | 0.001**        | 0.562                   | 0.717       | 0.641            | 47.0               | 83.0               | 0.29            |
| Monocyte   | 0.610      | 0.008**        | 0.531                   | 0.688       | 0.287            | 38.8               | 83.9               | 0.22            |
| Platelet   | 0.686      | 0.000**        | 0.612                   | 0.760       | 200.50           | 58.0               | 74.0               | 0.32            |
| MPV        | 0.631      | 0.002**        | 0.550                   | 0.712       | 9.15             | 55.6               | 68.9               | 0.24            |
| MPV/PC     | 0.681      | 0.000**        | 0.604                   | 0.758       | 3.80             | 63.0               | 71.0               | 0.34            |
| NLR        | 0.592      | 0.027*         | 0.512                   | 0.672       | 13.25            | 49.0               | 74.0               | 0.23            |

Significant differences are marked by \* (*p* < 0.05) or \*\* (*p* < 0.01).

Table 3. Clinical accuracy of baseline biomarkers in predicting negative blood culture in peritonitis subgroup

| Biomarker | AUC<br>ROC | <i>p</i> value | 95% Confidence Interval |             | Cut-off<br>value | Sensitivity<br>(%) | Specificity<br>(%) | Youden<br>index |
|-----------|------------|----------------|-------------------------|-------------|------------------|--------------------|--------------------|-----------------|
|           |            |                | Lower Bound             | Upper Bound |                  |                    |                    |                 |
| Platelet  | 0.638      | 0.004**        | 0.546                   | 0.730       | 234.5            | 63.8               | 60.4               | 0.24            |
| MPV       | 0.643      | 0.004**        | 0.556                   | 0.729       | 9.15             | 80.4               | 51.5               | 0.32            |
| MPV/PC    | 0.636      | 0.006**        | 0.541                   | 0.732       | 3.75             | 71.7               | 56.7               | 0.28            |
| MLR       | 0.586      | 0.046*         | 0.489                   | 0.683       | 0.6155           | 55.3               | 63.8               | 0.19            |
| PLR       | 0.613      | 0.020*         | 0.523                   | 0.702       | 241.05           | 61.7               | 62.4               | 0.24            |

Significant differences are marked by \* ( $p < 0.05$ ) or \*\* ( $p < 0.01$ ).

Table 4. Baseline and laboratory characteristics of the pancreatitis subgroup

| Characteristics                          | All patients              | Survivors                 | Nonsurvivors              | <i>p</i> value      |
|------------------------------------------|---------------------------|---------------------------|---------------------------|---------------------|
| Number of patients (%)                   | 67 (100 %)                | 28 (41.8 %)               | 39 (58.2 %)               | -                   |
| Males, number (%)                        | 48 (71.6 %)               | 28 (100.0 %)              | 20 (51.3 %)               | $p = 0.001^{**}$    |
| Age (years)                              | 54.15 ± 13.048            | 50.46 ± 11.79             | 56.79 ± 13.40             | $p = 0.049^*$       |
| Polymicrobial blood cultures, number (%) | 32 (47.8%)                | 0 (0.0)                   | 32 (82.1)                 | $p \leq 0.001^{**}$ |
| Negative blood culture number (%)        | 35 (52.2%)                | 28 (100)                  | 7 (17.9)                  | $p \leq 0.001^{**}$ |
| WBC count ( $10^9/L$ )                   | 12.30 ± 4.06              | 11.17 ± 4.73              | 13.12 ± 3.32              | $p = 0.037^*$       |
| Neutrophil ( $10^9/L$ )                  | 10.60 (7.55–12.80)        | 7.84 (5.98–12.00)         | 11.70 (9.34–13.20)        | $p = 0.005^{**}$    |
| Lymphocyte ( $10^9/L$ )                  | 0.92 (0.69–1.28)          | 1.10 (0.91–1.46)          | 0.84 (0.61–1.15)          | $p = 0.005^{**}$    |
| Monocyte ( $10^9/L$ )                    | 0.67 (0.50–0.89)          | 0.74 (0.49–1.04)          | 0.64 (0.50–0.86)          | $p = 0.162$         |
| Platelet ( $10^9/L$ )                    | 233.90 ± 123.08           | 280.14 ± 107.66           | 200.70 ± 123.98           | $p = 0.008^{**}$    |
| MPV (fL)                                 | 9.67 ± 2.51               | 8.40 ± 1.52               | 10.59 ± 2.70              | $p \leq 0.001^{**}$ |
| MPV/PC ratio (fL $10^{-5} \mu L^{-1}$ )  | 4.4 (2.2–6.6)             | 2.8 (2.2–4.1)             | 5.6 (3.3–8.5)             | $p = 0.003^{**}$    |
| NLR                                      | 11.35 (6.48–15.74)        | 6.57 (4.84–11.35)         | 14.29 (8.31–17.20)        | $p \leq 0.001^{**}$ |
| MLR                                      | 0.67 (0.46–1.16)          | 0.63 (0.40–1.15)          | 0.76 (0.53–1.16)          | $p = 0.360$         |
| PLR                                      | 223.28<br>(140.65–377.88) | 276.82<br>(133.19–341.90) | 203.47<br>(141.53–416.35) | $p = 0.387$         |

Data are shown as number (%), mean (standard deviation, SD), or median (interquartile range, IQR) as appropriate.

Significant differences are marked by \* ( $p < 0.05$ ) or \*\* ( $p < 0.01$ ).

Table 5. Clinical accuracy of baseline biomarkers in predicting lethal outcome in pancreatitis subgroup

| Biomarker  | AUC<br>ROC | <i>p</i> value | 95% Confidence Interval |             | Cut-off<br>value | Sensitivity<br>(%) | Specificity<br>(%) | Youden<br>index |
|------------|------------|----------------|-------------------------|-------------|------------------|--------------------|--------------------|-----------------|
|            |            |                | Lower Bound             | Upper Bound |                  |                    |                    |                 |
| Lymphocyte | 0.702      | 0.005**        | 0.576                   | 0.828       | 0.915            | 62.0               | 75.0               | 0.37            |
| Platelet   | 0.698      | 0.006**        | 0.571                   | 0.824       | 201.50           | 67.0               | 75.0               | 0.42            |
| MPV        | 0.798      | 0.000**        | 0.685                   | 0.912       | 8.75             | 73.0               | 80.1               | 0.54            |
| MPV/PC     | 0.717      | 0.003**        | 0.589                   | 0.845       | 4.30             | 71.0               | 78.0               | 0.49            |
| NLR        | 0.753      | 0.000**        | 0.633                   | 0.872       | 10.44            | 72.0               | 75.0               | 0.47            |

Significant differences are marked by \* ( $p < 0.05$ ) or \*\* ( $p < 0.01$ ).

Table 6. Clinical accuracy of baseline biomarkers in predicting negative blood culture in pancreatitis subgroup

| Biomarker  | AUC<br>ROC | <i>p</i> value | 95% Confidence Interval |             | Cut-off<br>value | Sensitivity<br>(%) | Specificity<br>(%) | Youden<br>index |
|------------|------------|----------------|-------------------------|-------------|------------------|--------------------|--------------------|-----------------|
|            |            |                | Lower Bound             | Upper Bound |                  |                    |                    |                 |
| Lymphocyte | 0.683      | 0.008**        | 0.553                   | 0.812       | 0.74             | 88.6               | 43.7               | 0.32            |
| Platelet   | 0.630      | 0.047*         | 0.489                   | 0.772       | 119.0            | 100                | 31.2               | 0.31            |
| MPV        | 0.790      | 0.000**        | 0.678                   | 0.901       | 8.95             | 78.8               | 74.2               | 0.53            |
| MPV/PC     | 0.696      | 0.007**        | 0.556                   | 0.835       | 5.29             | 78.8               | 64.5               | 0.43            |
| NLR        | 0.721      | 0.002**        | 0.598                   | 0.845       | 13.00            | 77.1               | 59.4               | 0.37            |

Significant differences are marked by \* ( $p < 0.05$ ) or \*\* ( $p < 0.01$ ).

Table 7. Baseline and laboratory characteristics of the trauma + sepsis subgroup

| Characteristics                                      | All patients              | Survivors                 | Nonsurvivors              | <i>p</i> value     |
|------------------------------------------------------|---------------------------|---------------------------|---------------------------|--------------------|
| Number of patients (%)                               | 83 (100%)                 | 57 (68.7%)                | 26 (31.3%)                | -                  |
| Males, number (%)                                    | 77 (92.8%)                | 51 (89.5)                 | 26 (100.0)                | <i>p</i> = 0.170   |
| Age (years)                                          | 39.60 ± 14.86             | 35.07 ± 10.26             | 49.54 ± 18.41             | <i>p</i> = 0.001** |
| Gram-positive blood cultures, number (%)             | 22 (26.5%)                | 22 (38.6)                 | 0 (0.0)                   | <i>p</i> = 0.001** |
| Polymicrobial blood culture number (%)               | 61 (73.5%)                | 35 (61.4)                 | 26 (100.0)                | <i>p</i> = 0.001** |
| WBC count (10 <sup>9</sup> /L)                       | 12.55 ± 6.29              | 12.62 ± 6.51              | 12.41 ± 5.88              | <i>p</i> = 0.891   |
| Neutrophil (10 <sup>9</sup> /L)                      | 10.00 (5.59–13.70)        | 10.00 (5.37–14.40)        | 9.89 (6.25–12.87)         | <i>p</i> = 0.973   |
| Lymphocyte (10 <sup>9</sup> /L)                      | 1.02 (0.64–1.48)          | 1.14 (0.71–1.46)          | 0.76 (0.60–2.22)          | <i>p</i> = 0.489   |
| Monocyte (10 <sup>9</sup> /L)                        | 0.61 (0.41–0.89)          | 0.63 (0.43–0.92)          | 0.56 (0.38–0.78)          | <i>p</i> = 0.253   |
| Platelet (10 <sup>9</sup> /L)                        | 245.64 ± 131.20           | 239.67 ± 114.57           | 258.72 ± 163.70           | <i>p</i> = 0.595   |
| MPV (fL)                                             | 8.44 ± 0.96               | 8.36 ± 0.80               | 8.60 ± 1.24               | <i>p</i> = 0.389   |
| MPV/PC ratio (fL 10 <sup>-5</sup> μL <sup>-1</sup> ) | 3.6 (2.4–5.7)             | 3.3 (2.5–5.4)             | 4.6 (1.6–6.9)             | <i>p</i> = 0.363   |
| NLR                                                  | 9.10 (5.08–15.19)         | 9.60 (4.97–13.74)         | 8.50 (5.36–18.32)         | <i>p</i> = 0.883   |
| MLR                                                  | 0.59 (0.33–0.94)          | 0.59 (0.33–1.06)          | 0.60 (0.37–0.83)          | <i>p</i> = 0.556   |
| PLR                                                  | 210.41<br>(147.89–337.60) | 198.60<br>(145.80–336.45) | 246.08<br>(162.22–373.41) | <i>p</i> = 0.356   |

Data are shown as number (%), mean (standard deviation, SD), or median (interquartile range, IQR) as appropriate.  
Significant differences are marked by \* (*p* < 0.05) or \*\* (*p* < 0.01).

Table 8. Clinical accuracy of baseline biomarkers in predicting polymicrobial blood culture in trauma patients with secondary sepsis

| Biomarker  | AUC<br>ROC | <i>p</i><br>value | 95% Confidence Interval |             | Cut-off<br>value | Sensitivity<br>(%) | Specificity<br>(%) | Youden<br>index |
|------------|------------|-------------------|-------------------------|-------------|------------------|--------------------|--------------------|-----------------|
|            |            |                   | Lower Bound             | Upper Bound |                  |                    |                    |                 |
| Lymphocyte | 0.639      | 0.045*            | 0.502                   | 0.776       | 0.93             | 54.1               | 77.3               | 0.31            |
| NLR        | 0.659      | 0.027*            | 0.532                   | 0.787       | 12.97            | 39.3               | 90.9               | 0.30            |

Significant differences are marked by \* (*p* < 0.05) or \*\* (*p* < 0.01).

Table 9. Baseline and laboratory characteristics of the trauma subgroup

| Characteristics                                      | All patients              | Survivors                 | Nonsurvivors              | <i>p</i> value     |
|------------------------------------------------------|---------------------------|---------------------------|---------------------------|--------------------|
| Number of patients (%)                               | 46 (100%)                 | 35 (76.1%)                | 11 (23.9%)                | -                  |
| Males, number (%)                                    | 32 (69.6 %)               | 21 (60.0 %)               | 11 (100.0 %)              | <i>p</i> = 0.020*  |
| Age (years)                                          | 53.20 ± 18.93             | 46.34 ± 16.34             | 75.00 ± 4.05              | <i>p</i> ≤ 0.001** |
| WBC count (10 <sup>9</sup> /L)                       | 13.32 ± 5.64              | 13.88 ± 5.67              | 11.53 ± 5.41              | <i>p</i> = 0.232   |
| Neutrophil (10 <sup>9</sup> /L)                      | 10.04 (7.35–13.92)        | 10.50 (7.66–14.30)        | 8.68 (5.97–11.70)         | <i>p</i> = 0.212   |
| Lymphocyte (10 <sup>9</sup> /L)                      | 0.95 (0.58–1.28)          | 1.06 (0.56–1.53)          | 0.93 (0.77–0.96)          | <i>p</i> = 0.193   |
| Monocyte (10 <sup>9</sup> /L)                        | 0.67 (0.39–1.14)          | 0.87 (0.38–1.35)          | 0.46 (0.39–1.05)          | <i>p</i> = 0.201   |
| Platelet (10 <sup>9</sup> /L)                        | 301.31 ± 249.50           | 290.82 ± 263.91           | 334.70 ± 204.22           | <i>p</i> = 0.616   |
| MPV (fL)                                             | 8.90 ± 1.62               | 8.81 ± 1.06               | 9.18 ± 2.82               | <i>p</i> = 0.683   |
| MPV/PC ratio (fL 10 <sup>-5</sup> μL <sup>-1</sup> ) | 4.2 (2.0–6.5)             | 4.6 (2.9–6.6)             | 2.3 (1.4–6.5)             | <i>p</i> = 0.415   |
| NLR                                                  | 11.13 (7.64–14.59)        | 11.51 (7.65–15.08)        | 10.26 (7.61–12.51)        | <i>p</i> = 0.722   |
| MLR                                                  | 0.71 (0.45–1.21)          | 0.80 (0.51–1.25)          | 0.48 (0.43–1.10)          | <i>p</i> = 0.261   |
| PLR                                                  | 243.24<br>(148.22–380.69) | 220.33<br>(143.39–315.17) | 378.19<br>(237.35–574.38) | <i>p</i> = 0.029*  |

Data are shown as number (%), mean (standard deviation, SD), or median (interquartile range, IQR) as appropriate. Significant differences are marked by \* (*p* < 0.05) or \*\* (*p* < 0.01).

Table 10. Clinical accuracy of baseline biomarker PLR in predicting lethal outcome in trauma subgroup

| Biomarker | AUC ROC | <i>p</i> value | 95% Confidence Interval |             | Cut-off value | Sensitivity (%) | Specificity (%) | Youden index |
|-----------|---------|----------------|-------------------------|-------------|---------------|-----------------|-----------------|--------------|
|           |         |                | Lower Bound             | Upper Bound |               |                 |                 |              |
| PLR       | 0.719   | 0.030*         | 0.532                   | 0.907       | 327.72        | 64.0            | 80.0            | 0.44         |

Significant differences are marked by \* (*p* < 0.05) or \*\* (*p* < 0.01).

Figure 1. A Receiver operating characteristic (ROC) curve for composite bioscore in peritonitis subgroup and the lethal outcome (AUC =0.718)

B Percentage of nonsurvivors according to the each bioscore point value in peritonitis subgroup (darkest shade – cut-off bioscore point value)

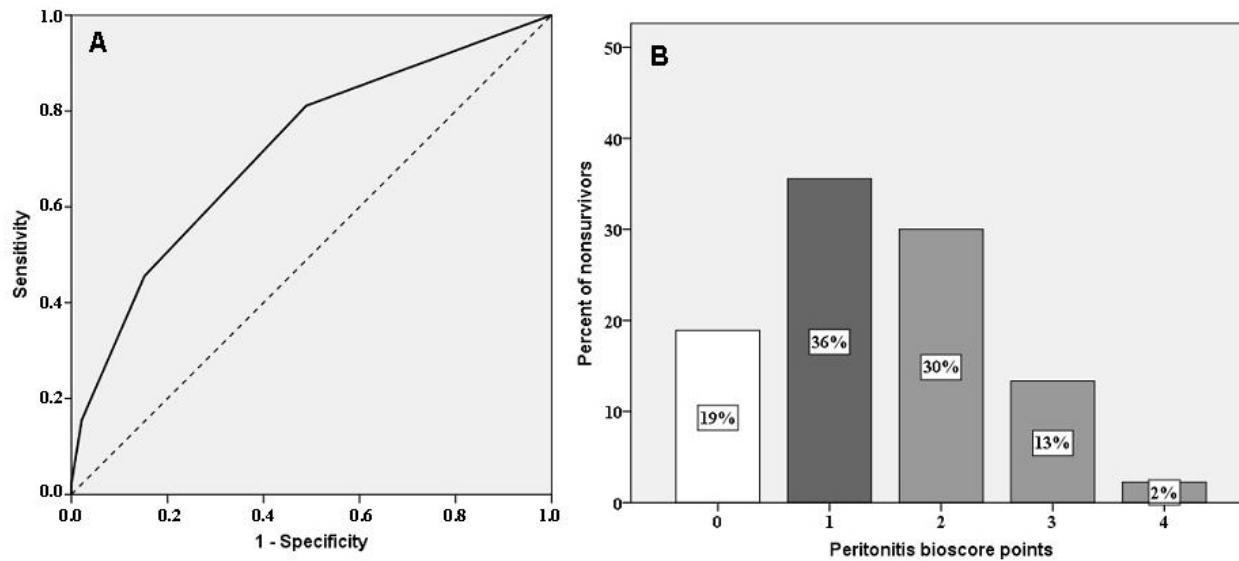

Figure 2. A Receiver operating characteristic (ROC) curve for composite bioscore in trauma with secondary sepsis subgroup and the lethal outcome (AUC = 0.782)  
B Percentage of nonsurvivors according to the each bioscore point value in trauma with secondary sepsis subgroup (darkest shade – cut-off bioscore point value)

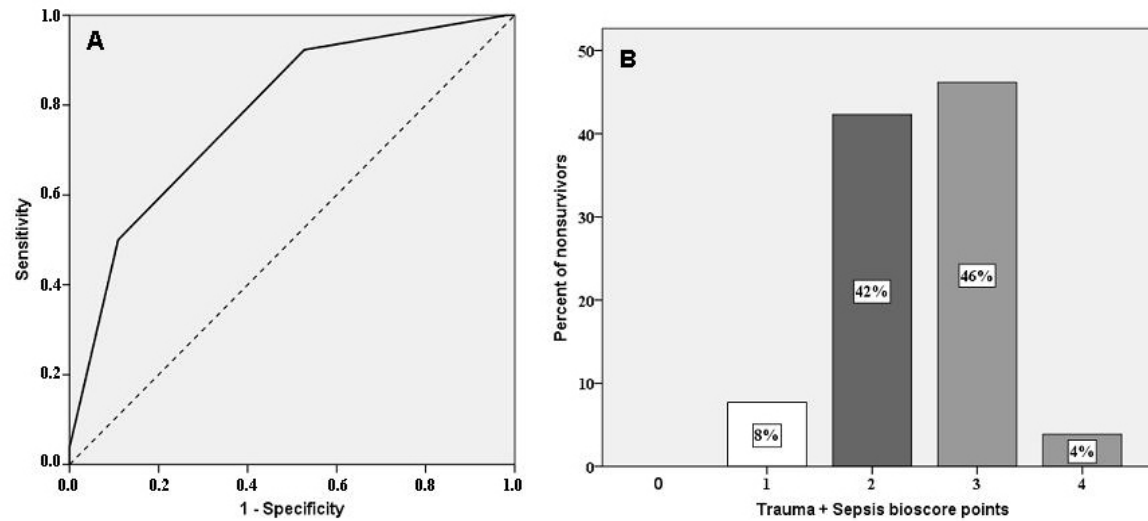

Figure 3. A Receiver operating characteristic (ROC) curve for composite bioscore in trauma subgroup and the lethal outcome (AUC = 0.823)  
B Percentage of nonsurvivors according to the each bioscore point value in trauma subgroup (darkest shade – cut-off bioscore point value)

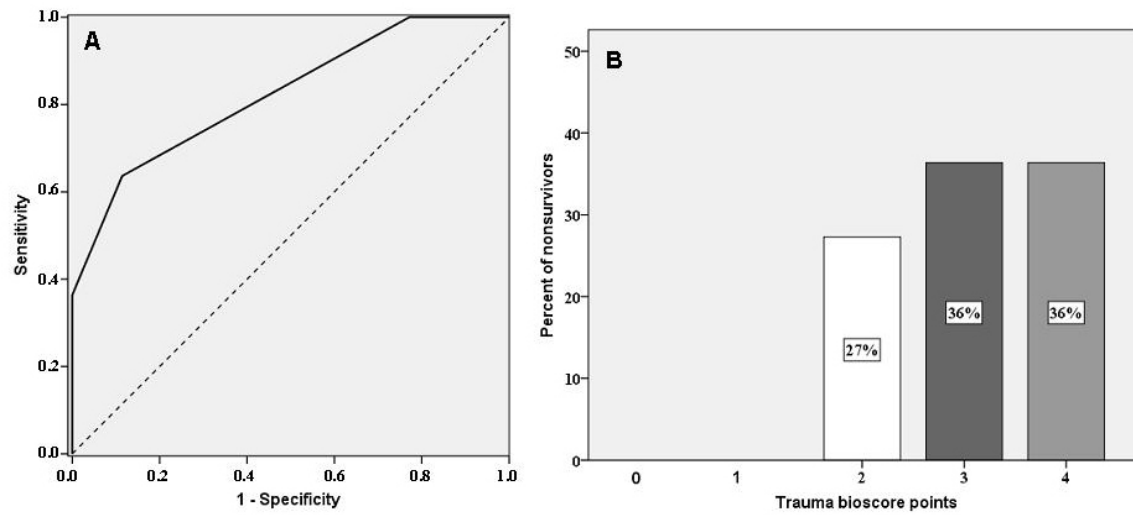



Table 11. Spearman rho correlations between biomarkers in all patients \*negative correlation

| <b>Biomarkers</b> | <b>NLR</b>                                                                      | <b>MLR</b>                                                                                    | <b>PLR</b>                                                                                        |
|-------------------|---------------------------------------------------------------------------------|-----------------------------------------------------------------------------------------------|---------------------------------------------------------------------------------------------------|
| <b>MPV/PC</b>     | <b>survivors</b><br>0.113; p = 0.103<br><b>nonsurvivors</b><br>0.111; p = 0.157 | <b>survivors</b><br>-0.017; p = 0.803*<br><b>nonsurvivors</b><br>-0.140; p = 0.073*           | <b>survivors</b><br>-0.556; <b>p ≤ 0.001*</b><br><b>nonsurvivors</b><br>-0.490; <b>p ≤ 0.001*</b> |
| <b>NLR</b>        |                                                                                 | <b>survivors</b><br>0.497; <b>p ≤ 0.001</b><br><b>nonsurvivors</b><br>0.384; <b>p ≤ 0.001</b> | <b>survivors</b><br>0.431; <b>p ≤ 0.001</b><br><b>nonsurvivors</b><br>0.470; <b>p ≤ 0.001</b>     |
| <b>MLR</b>        |                                                                                 |                                                                                               | <b>survivors</b><br>0.358; <b>p ≤ 0.001</b><br><b>nonsurvivors</b><br>0.454; <b>p ≤ 0.001</b>     |

Table 12. Spearman rho correlations between biomarkers in trauma group \*negative correlation

| <b>Biomarkers</b> | <b>NLR</b>                                                                      | <b>MLR</b>                                                                               | <b>PLR</b>                                                                                        |
|-------------------|---------------------------------------------------------------------------------|------------------------------------------------------------------------------------------|---------------------------------------------------------------------------------------------------|
| <b>MPV/PC</b>     | <b>survivors</b><br>0.278; p = 0.106<br><b>nonsurvivors</b><br>0.509; p = 0.110 | <b>survivors</b><br>-0.274; p = 0.111*<br><b>nonsurvivors</b><br>0.782; <b>p = 0.004</b> | <b>survivors</b><br>-0.693; <b>p ≤ 0.001*</b><br><b>nonsurvivors</b><br>-0.909; <b>p ≤ 0.001*</b> |
| <b>NLR</b>        |                                                                                 | <b>survivors</b><br>0.513; <b>p = 0.002</b><br><b>nonsurvivors</b><br>0.409; p = 0.212   | <b>survivors</b><br>0.330; p = 0.053<br><b>nonsurvivors</b><br>-0.255; p = 0.450*                 |
| <b>MLR</b>        |                                                                                 |                                                                                          | <b>survivors</b><br>0.473; <b>p = 0.004</b><br><b>nonsurvivors</b><br>-0.655; <b>p = 0.029*</b>   |

Figure 4. Scattergram for trauma subgroup (survivors and nonsurvivors) of: A. MPV/PC versus MLR; B. NLR versus MLR; C. MPV/PC versus PLR; D. MLR versus PLR

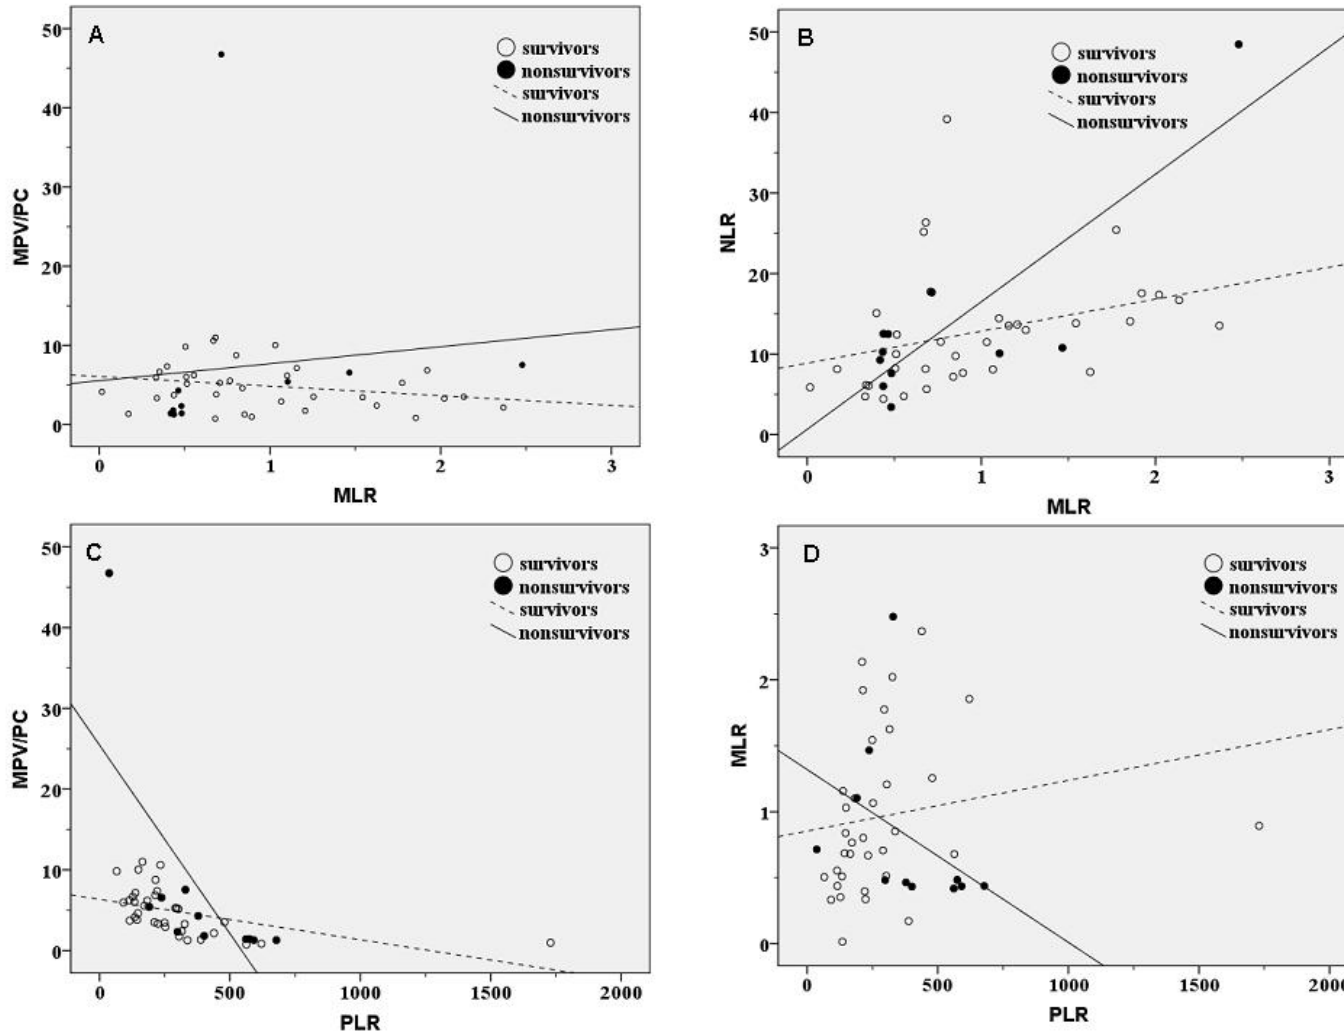

Table 13. Spearman rho correlations between biomarkers in survivors with Gram-positive and negative blood cultures \*negative correlation

| <b>Biomarkers</b> | <b>NLR</b>                                                                      | <b>MLR</b>                                                                                    | <b>PLR</b>                                                                                        |
|-------------------|---------------------------------------------------------------------------------|-----------------------------------------------------------------------------------------------|---------------------------------------------------------------------------------------------------|
| <b>MPV/PC</b>     | <b>Gram-positive</b><br>0.072; p = 0.612<br><b>negative</b><br>0.069; p = 0.507 | <b>Gram-positive</b><br>0.140; p = 0.322<br><b>negative</b><br>- 0.086; p = 0.406             | <b>Gram-positive</b><br>-0.406; p = <b>0.003*</b><br><b>negative</b><br>-0.647; p ≤ <b>0.001*</b> |
| <b>NLR</b>        |                                                                                 | <b>Gram-positive</b><br>0.543; p ≤ <b>0.001</b><br><b>negative</b><br>0.669; p ≤ <b>0.001</b> | <b>Gram-positive</b><br>0.482; p ≤ <b>0.001</b><br><b>negative</b><br>0.481; p ≤ <b>0.001</b>     |
| <b>MLR</b>        |                                                                                 |                                                                                               | <b>Gram-positive</b><br>0.433; p = <b>0.001</b><br><b>negative</b><br>0.523; p ≤ <b>0.001</b>     |

Table 14. Spearman rho correlations between biomarkers in nonsurvivors with Gram-positive and polymicrobial blood cultures \*negative correlation

| <b>Biomarkers</b> | <b>NLR</b>                                                                             | <b>MLR</b>                                                                                         | <b>PLR</b>                                                                                         |
|-------------------|----------------------------------------------------------------------------------------|----------------------------------------------------------------------------------------------------|----------------------------------------------------------------------------------------------------|
| <b>MPV/PC</b>     | <b>Gram-positive</b><br>0.050; p = 0.898<br><b>polymicrobial</b><br>- 0.020; p = 0.823 | <b>Gram-positive</b><br>0.317; p = 0.406<br><b>polymicrobial</b><br>- 0.266; p = <b>0.003*</b>     | <b>Gram-positive</b><br>0.083; p = 0.831<br><b>polymicrobial</b><br>-0.498; p ≤ <b>0.001*</b>      |
| <b>NLR</b>        |                                                                                        | <b>Gram-positive</b><br>0.748; p = <b>0.005</b><br><b>polymicrobial</b><br>0.380; p ≤ <b>0.001</b> | <b>Gram-positive</b><br>0.881; p ≤ <b>0.001</b><br><b>polymicrobial</b><br>0.533; p ≤ <b>0.001</b> |
| <b>MLR</b>        |                                                                                        |                                                                                                    | <b>Gram-positive</b><br>0.664; p = <b>0.018</b><br><b>polymicrobial</b><br>0.534; p ≤ <b>0.001</b> |

Table 15. Univariate odds ratios of variables for predicting lethal outcome in peritonitis subgroup

| Variables                   | Standard<br>$\beta$ value | OR    | 95% Confidence Interval |             | <i>p</i> value |
|-----------------------------|---------------------------|-------|-------------------------|-------------|----------------|
|                             |                           |       | Lower Bound             | Upper Bound |                |
| Female gender               | 0.997                     | 2.710 | 1.504                   | 4.881       | 0.001**        |
| Age                         | 0.067                     | 1.070 | 1.047                   | 1.093       | 0.000**        |
| Gram-positive blood culture | -0.092                    | 0.912 | 0.366                   | 2.275       | 0.844          |
| Gram-negative blood culture | -0.154                    | 0.857 | 0.233                   | 3.158       | 0.817          |
| Polymicrobial blood culture | 2.258                     | 9.560 | 4.251                   | 21.499      | 0.000**        |
| WBC                         | -0.024                    | 0.976 | 0.929                   | 1.025       | 0.333          |
| Neutrophil                  | -0.018                    | 0.983 | 0.930                   | 1.038       | 0.533          |
| Lymphocyte                  | -0.152                    | 0.859 | 0.627                   | 1.177       | 0.345          |
| Monocyte                    | -0.779                    | 0.459 | 0.235                   | 0.895       | 0.022*         |
| Platelet                    | -0.005                    | 0.995 | 0.993                   | 0.997       | 0.000**        |
| MPV                         | 0.304                     | 1.356 | 1.117                   | 1.645       | 0.002**        |
| MPV/PC                      | 0.054                     | 1.055 | 1.006                   | 1.107       | 0.027*         |
| NLR                         | 0.038                     | 1.039 | 1.009                   | 1.071       | 0.009**        |
| MLR                         | 0.008                     | 1.008 | 0.615                   | 1.652       | 0.974          |
| PLR                         | 0.000                     | 1.000 | 0.999                   | 1.001       | 0.758          |

Significant differences are marked by \* ( $p < 0.05$ ) or \*\* ( $p < 0.01$ ).

Table 16. Independent predictors of lethal outcome by multivariate logistic regression analysis in peritonitis subgroup

| Variables                                | Standard<br>$\beta$ value | OR     | 95% Confidence Interval |             | <i>p</i> value |
|------------------------------------------|---------------------------|--------|-------------------------|-------------|----------------|
|                                          |                           |        | Lower Bound             | Upper Bound |                |
| Female gender                            | 1.753                     | 5.769  | 1.918                   | 17.358      | 0.002**        |
| Age                                      | 0.113                     | 1.120  | 1.077                   | 1.165       | 0.000**        |
| Polymicrobial blood culture <sup>#</sup> | 2.774                     | 16.019 | 4.225                   | 60.741      | 0.000**        |
| NLR                                      | 0.060                     | 1.061  | 1.009                   | 1.117       | 0.022*         |

<sup>#</sup>polymicrobial blood culture compared to negative blood culture

Significant differences are marked by \* ( $p < 0.05$ ) or \*\* ( $p < 0.01$ ).

Table 17. Univariate odds ratios of variables for predicting lethal outcome in pancreatitis subgroup

| Variables  | Standard<br>$\beta$ value | OR    | 95% Confidence Interval |             | <i>p</i> value |
|------------|---------------------------|-------|-------------------------|-------------|----------------|
|            |                           |       | Lower Bound             | Upper Bound |                |
| Age        | 0.039                     | 1.040 | 0.999                   | 1.082       | 0.040*         |
| WBC        | 0.129                     | 1.138 | 0.996                   | 1.299       | 0.038*         |
| Neutrophil | 0.165                     | 1.180 | 1.022                   | 1.362       | 0.024*         |
| Lymphocyte | -1.611                    | 0.200 | 0.052                   | 0.767       | 0.019*         |
| Monocyte   | -1.000                    | 0.368 | 0.091                   | 1.483       | 0.160          |
| Platelet   | -0.006                    | 0.994 | 0.990                   | 0.999       | 0.012*         |
| MPV        | 0.582                     | 1.789 | 1.234                   | 2.594       | 0.002**        |
| MPV/PC     | 0.310                     | 1.363 | 1.066                   | 1.744       | 0.014*         |
| NLR        | 0.167                     | 1.182 | 1.061                   | 1.316       | 0.002**        |
| MLR        | 0.454                     | 1.574 | 0.538                   | 4.608       | 0.408          |
| PLR        | 0.000                     | 1.000 | 0.997                   | 1.003       | 0.999          |

Significant differences are marked by \* ( $p < 0.05$ ) or \*\* ( $p < 0.01$ ).

Table 18. Independent predictors of lethal outcome by multivariate logistic regression analysis in pancreatitis subgroup

| Variables  | Standard<br>$\beta$ value | OR    | 95% Confidence Interval |             | <i>p</i> value |
|------------|---------------------------|-------|-------------------------|-------------|----------------|
|            |                           |       | Lower Bound             | Upper Bound |                |
| Age        | 0.136                     | 1.146 | 1.031                   | 1.274       | 0.012*         |
| Lymphocyte | -3.639                    | 0.026 | 0.001                   | 1.140       | 0.039*         |
| MPV        | 1.066                     | 2.903 | 1.111                   | 7.588       | 0.030*         |

Significant differences are marked by \* ( $p < 0.05$ ) or \*\* ( $p < 0.01$ ).
